# Supplementary material
Source: Springer Nature journal article supplement (https://www.springermedizin.de/resource/supplementary/12889_2011_3428_MOESM1_ESM.pdf/9489034)
Supplement: MOESM1 [file 9489034]

Participant Recruitment & Screening

Participant met inclusion criteria

Participant consented to study

Participant  
randomly assigned  
to  
Intervention Group

Survey 1

6 month  
intervention

Survey 2  
(6 months)

Survey 3  
(12 months)

Participant  
randomly assigned  
to  
Control Group

Survey 1

No  
intervention

Survey 2  
(6 months)

Survey 3  
(12 months)
